# Supplementary material for: Rooftop and Surface Garden Soils in Bangladesh Harbor Diverse Resistome Profiles
Source: Research Square preprint supplement (doi:10.21203/rs.3.rs-8462036/v1), 2026-02-19
Supplement: Supplementary file 1 [file 0e9e5c68a151768561e0a8a2.docx]

**Supplementary Figures and Tables**


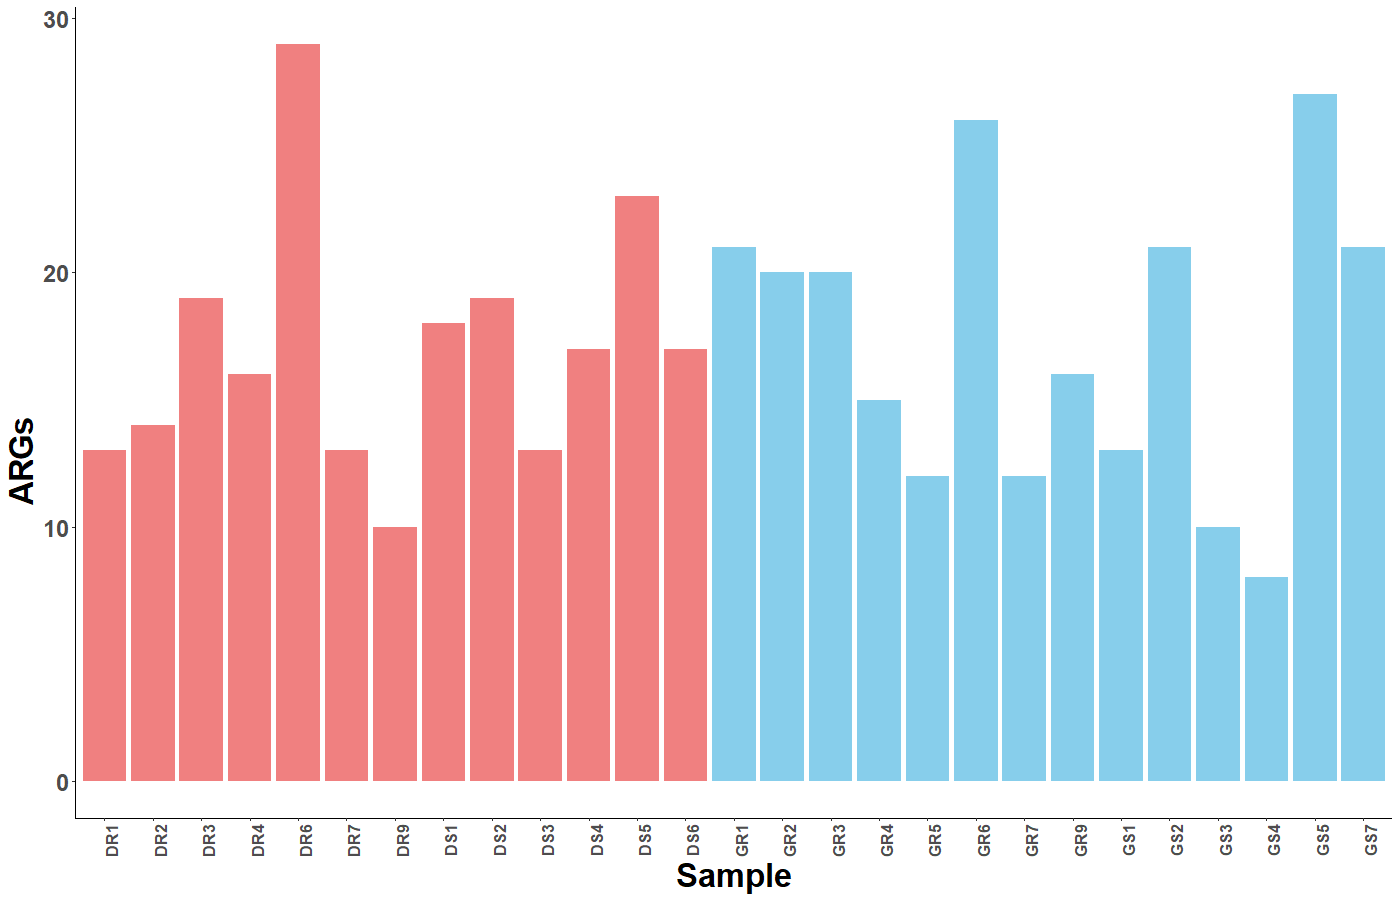


**Fig. S1.** Distribution of antibiotic resistance genes (ARGs) across soil samples. Bar plots illustrate the total number of ARGs predicted in the microbiomes of rooftop and surface garden soil samples from Dhaka (brick red) and Gazipur (sky blue) districts, Bangladesh. The plot highlights the variation in ARG abundance across different garden types and locations, providing insights into the prevalence of antibiotic resistance in these environments.

**Table S1:** Study sample information, SRA accession numbers of the shotgun whole metagenome sequences and reads mapped against antibiotic resistance genes (ARGs).

| **Sl. No.** | **Sample ID** | **Collection site** | **Coordinates** | **Source** | **No. of Raw Read Pairs** | **No. of quality reads (after trimming)** | **GC Content (%)** | **SRA accessions** |
| --- | --- | --- | --- | --- | --- | --- | --- | --- |
| 1 | DR1 | DNCC, Bangladesh | 23.78° N, 90.41° E | DRG | 29779648 | 29636639 | 39.46 | SRR32835637 |
| 2 | DR2 | DNCC, Bangladesh | 23.78° N, 90.41° E | DRG | 29649252 | 29471130 | 62.04 | SRR32835631 |
| 3 | DR3 | DNCC, Bangladesh | 23.78° N, 90.41° E | DRG | 23287537 | 23232035 | 61.78 | SRR32835620 |
| 4 | DR4 | DNCC, Bangladesh | 23.78° N, 90.41° E | DRG | 21731087 | 21613037 | 62.94 | SRR32835612 |
| 5 | DR6 | DNCC, Bangladesh | 23.78° N, 90.41° E | DRG | 23111024 | 22975156 | 63.54 | SRR32835611 |
| 6 | DR7 | DNCC, Bangladesh | 23.78° N, 90.41° E | DRG | 24429423 | 24317641 | 44.44 | SRR32835636 |
| 7 | DR9 | DNCC, Bangladesh | 23.78° N, 90.41° E | DRG | 22325712 | 22192955 | 46.56 | SRR32835635 |
| 8 | DS1 | DNCC, Bangladesh | 23.78° N, 90.41° E | DSG | 25690404 | 25569069 | 42.56 | SRR32835634 |
| 9 | DS2 | DNCC, Bangladesh | 23.78° N, 90.41° E | DSG | 21521300 | 21392353 | 55.96 | SRR32835633 |
| 10 | DS3 | DNCC, Bangladesh | 23.78° N, 90.41° E | DSG | 23093248 | 22955591 | 61.5 | SRR32835632 |
| 11 | DS4 | DNCC, Bangladesh | 23.78° N, 90.41° E | DSG | 27849938 | 27659560 | 51.18 | SRR32835630 |
| 12 | DS5 | DNCC, Bangladesh | 23.78° N, 90.41° E | DSG | 30378999 | 30259676 | 42.89 | SRR32835629 |
| 13 | DS6 | DNCC, Bangladesh | 23.78° N, 90.41° E | DSG | 21237551 | 21146204 | 40.31 | SRR32835628 |
| 14 | GR1 | GCC, Bangladesh | 23.99° N, 90.38° E | GRG | 21786215 | 21665627 | 60.78 | SRR32835626 |
| 15 | GR2 | GCC, Bangladesh | 23.99° N, 90.38° E | GRG | 24639131 | 24489187 | 62.43 | SRR32835627 |
| 16 | GR3 | GCC, Bangladesh | 23.99° N, 90.38° E | GRG | 25198511 | 25070828 | 45.54 | SRR32835625 |
| 17 | GR4 | GCC, Bangladesh | 23.99° N, 90.38° E | GRG | 20783178 | 20702232 | 38.89 | SRR32835624 |
| 18 | GR5 | GCC, Bangladesh | 23.99° N, 90.38° E | GRG | 21389519 | 21289176 | 41.78 | SRR32835623 |
| 19 | GR6 | GCC, Bangladesh | 23.99° N, 90.38° E | GRG | 21711373 | 21572157 | 41.71 | SRR32835622 |
| 20 | GR7 | GCC, Bangladesh | 23.99° N, 90.38° E | GRG | 22611444 | 22478939 | 64.29 | SRR32835621 |
| 21 | GR9 | GCC, Bangladesh | 23.99° N, 90.38° E | GRG | 22104607 | 22014781 | 44.23 | SRR32835619 |
| 22 | GS1 | GCC, Bangladesh | 23.99° N, 90.38° E | GSG | 32917251 | 32796709 | 39.03 | SRR32835618 |
| 23 | GS2 | GCC, Bangladesh | 23.99° N, 90.38° E | GSG | 29980331 | 29865313 | 42.49 | SRR32835617 |
| 24 | GS3 | GCC, Bangladesh | 23.99° N, 90.38° E | GSG | 24704774 | 24576770 | 60.37 | SRR32835615 |
| 25 | GS4 | GCC, Bangladesh | 23.99° N, 90.38° E | GSG | 22808240 | 22662472 | 63.87 | SRR32835616 |
| 26 | GS5 | GCC, Bangladesh | 23.99° N, 90.38° E | GSG | 23058381 | 22923630 | 59.88 | SRR32835614 |
| 27 | GS7 | GCC, Bangladesh | 23.99° N, 90.38° E | GSG | 24775876 | 24632171 | 61.08 | SRR32835613 |
| Total | | | | | 662553954 | 659161038 |  |  |
| Average | | | | | 24539035.33 | 24413371.78 | 51.91 |  |

DNCC: Dhaka North City Corporation, GCC: Gazipur City Corporation, DRG: Dhaka Rooftop Garden, DSG: Dhaka Surface Garden, GRG: Gazipur Rooftop Garden,

GSG: Gazipur Surface Garden, DR: Dhaka Rooftop, DS: Dhaka Surface, GR: Gazipur Rooftop, and GS: Gazipur Surface.

**Table S2**. Distribution of antibiotic resistance genes (ARGs) across metagenomes from Dhaka rooftop gardens (DRG), Dhaka surface gardens (DSG), Gazipur rooftop gardens (GRG), and Gazipur surface gardens (GSG) soils.

| **ARGs** | **DRG** | **DSG** | **GRG** | **GSG** |
| --- | --- | --- | --- | --- |
| *vanW(I cluster)* | 21.9 | 16.84 | 18.4 | 17.84 |
| *vanT(G cluster)* | 8.52 | 18.18 | 15.34 | 14.86 |
| *vanY(M cluster)* | 11.19 | 6.73 | 9.82 | 9.46 |
| *vanY(B cluster)* | 13.14 | 9.76 | 8.18 | 5.41 |
| *adeF* | 9.25 | 0 | 4.09 | 7.84 |
| *qacG* | 4.62 | 3.7 | 4.91 | 7.3 |
| *FosBx1* | 2.43 | 4.71 | 5.93 | 3.78 |
| *vanY(A cluster)* | 2.92 | 4.38 | 4.29 | 2.97 |
| *vanW(G cluster)* | 1.95 | 5.05 | 3.27 | 3.51 |
| *vanY(G cluster)* | 3.41 | 4.04 | 2.66 | 2.43 |
| *vanY(F cluster)* | 3.16 | 3.03 | 1.64 | 2.43 |
| *qacJ* | 0.73 | 2.02 | 2.86 | 2.97 |
| *rsmA* | 2.92 | 0.34 | 2.04 | 2.97 |
| *BcIII* | 1.22 | 2.02 | 1.64 | 1.62 |
| *tetB(P)* | 0.24 | 3.03 | 1.23 | 0.54 |
| *vanG* | 0.24 | 2.69 | 0.82 | 0.81 |
| *FosI* | 0.73 | 0 | 1.23 | 1.89 |
| *BcI* | 0.24 | 1.68 | 1.02 | 0.27 |
| *Pa soxR* | 1.46 | 0 | 0.82 | 0.27 |
| *vanW(B cluster)* | 0.73 | 0.34 | 0.2 | 1.35 |
| *FosA8* | 0.73 | 0 | 0.2 | 1.62 |
| *norC* | 0 | 0.34 | 0.61 | 1.35 |
| *vanXY(G cluster)* | 0 | 1.01 | 1.02 | 0.27 |
| *FosB* | 0.24 | 1.68 | 0.61 | 0 |
| *Mt rpsL* | 0.49 | 0.34 | 0.82 | 0 |
| *ErmD* | 0.49 | 0.67 | 0.2 | 0.54 |
| *msr(G)* | 0 | 0 | 1.23 | 0 |
| *Bp cat86* | 0 | 0.7 | 0.41 | 0.54 |
| *AbaQ* | 0.97 | 0 | 0 | 0 |
| *mefF* | 0.24 | 0.34 | 0.2 | 0.27 |
| *BcII* | 0.24 | 0.67 | 0 | 0 |
| *vanH(O cluster)* | 0.24 | 0 | 0.2 | 0.27 |
| *msr(I)* | 0 | 0.67 | 0.2 | 0 |
| *Sr otr(A)* | 0.24 | 0.67 | 0 | 0 |
| *tet(Q)* | 0 | 0 | 0 | 0.81 |
| *AAC(6')-Ib'* | 0 | 0 | 0.41 | 0 |
| *aadK* | 0.24 | 0 | 0.2 | 0 |
| *ykkC* | 0.24 | 0 | 0.2 | 0 |
| *ykkD* | 0.24 | 0 | 0.2 | 0 |
| *AIM-1* | 0 | 0 | 0.2 | 0.27 |
| *mphL* | 0.24 | 0.34 | 0 | 0 |
| *TEM-116* | 0 | 0.34 | 0 | 0.27 |
| *nimJ* | 0.24 | 0 | 0 | 0.27 |
| *ArnT* | 0 | 0 | 0 | 0.54 |
| *FosG* | 0 | 0 | 0.41 | 0 |
| *FosH* | 0.24 | 0 | 0.2 | 0 |
| *FosXCC* | 0.24 | 0.34 | 0 | 0 |
| *sul1* | 0.24 | 0 | 0 | 0.27 |
| *sul2* | 0.24 | 0 | 0 | 0.27 |
| *AAC(3)-VIa* | 0 | 0 | 0 | 0.27 |
| *ANT(3'')-IIa* | 0.24 | 0 | 0 | 0 |
| *ANT(4')-Ia* | 0 | 0 | 0.2 | 0 |
| *aadA7* | 0 | 0 | 0 | 0.27 |
| *amrA* | 0 | 0 | 0.2 | 0 |
| *qacEdelta1* | 0.24 | 0 | 0 | 0 |
| *qacL* | 0.24 | 0 | 0 | 0 |
| *vanA* | 0 | 0.34 | 0 | 0 |
| *vanH(A cluster)* | 0 | 0.34 | 0 | 0 |
| *vanH(B cluster)* | 0 | 0 | 0 | 0.27 |
| *vanH(F cluster)* | 0 | 0.34 | 0 | 0 |
| *vanO* | 0 | 0 | 0 | 0.27 |
| *vanR(A cluster)* | 0 | 0.337 | 0 | 0 |
| *vanR(F cluster)* | 0 | 0.337 | 0 | 0 |
| *vanR(M cluster)* | 0 | 0 | 0 | 0.27 |
| *vanX(B cluster)* | 0 | 0.34 | 0 | 0 |
| *LnuH* | 0 | 0 | 0 | 0.27 |
| *lmrB* | 0 | 0 | 0.2 | 0 |
| *cipA* | 0 | 0.34 | 0 | 0 |
| *vmlR* | 0 | 0 | 0.2 | 0 |
| *mphK* | 0 | 0 | 0.2 | 0 |
| *Type B NfxB* | 0.24 | 0 | 0 | 0 |
| *nalD* | 0.24 | 0 | 0 | 0 |
| *MexL* | 0.24 | 0 | 0 | 0 |
| *TEM-181* | 0 | 0 | 0.2 | 0 |
| *TEM-207* | 0 | 0.34 | 0 | 0 |
| *TEM-245* | 0 | 0.34 | 0 | 0 |
| *SAT-4* | 0.24 | 0 | 0 | 0 |
| *tmrB* | 0 | 0 | 0.2 | 0 |
| *bcrA* | 0.24 | 0 | 0 | 0 |
| *bcrB* | 0.24 | 0 | 0 | 0 |
| *bcrC* | 0.24 | 0 | 0 | 0 |
| *Pa catB7* | 0.24 | 0 | 0 | 0 |
| *catB11* | 0 | 0 | 0.2 | 0 |
| *Ab AbaF* | 0 | 0 | 0.2 | 0 |
| *tet(36)* | 0 | 0 | 0 | 0.27 |
| *tet(45)* | 0 | 0 | 0.2 | 0 |
| *tet(W/N/W)* | 0.24 | 0 | 0 | 0 |
| *poxtA* | 0 | 0.34 | 0 | 0 |
